# Supplementary material for: Laser-Induced Forward Transferred Optical Scattering Nanosilica for Transparent Displays
Source: MDPI journal article supplement (doi:10.3390/nano12203674), 2022-10-19
Supplement: s1 [file s1]

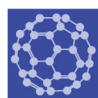

Supporting Information

# Laser-Induced Forward Transferred Optical Scattering Nanosilica for Transparent Displays

Ruo-Zhou Li <sup>1,2</sup>, Mingqing Yang <sup>1,2</sup>, Lvjiu Guo <sup>1</sup>, Ke Qu <sup>3</sup>, Tong Jian <sup>3</sup>, Ying Yu <sup>1,2</sup> and Jing Yan <sup>3,\*</sup><sup>1</sup> College of Integrated Circuit Science and Engineering, Nanjing University of Posts and Telecommunications, Nanjing 210023, China<sup>2</sup> National and Local Joint Engineering Laboratory of RF Integration and Micro Assembly Technology, Nanjing University of Posts and Telecommunications, Nanjing 210023, China<sup>3</sup> College of Electronic and Optical Engineering, Nanjing University of Posts and Telecommunications, Nanjing 210023, China

\* Correspondence: jing.yan@njupt.edu.cn

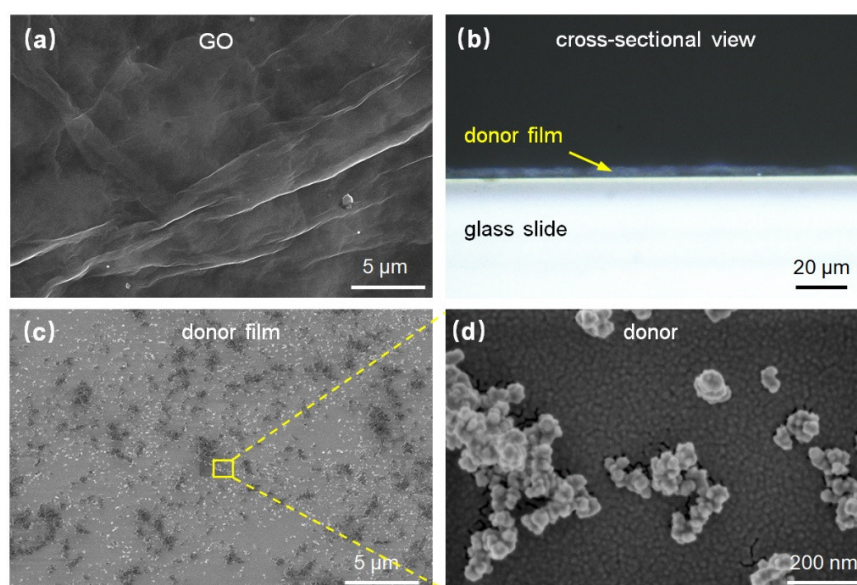

**Figure S1.** SEM image of (a) graphene oxide. (b) Cross-sectional microscope image of the donor film. (c) SEM image of the donor film, and (d) an enlarged view.

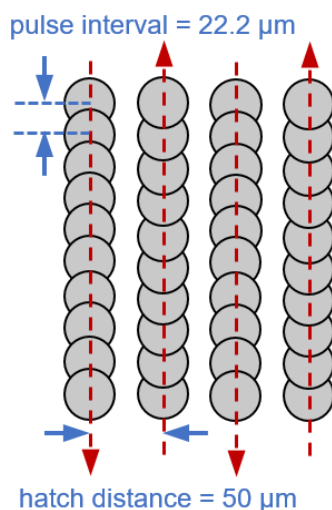

**Figure S2.** Schematic diagram of the laser bidirectional scanning strategy.

(a) Transmission measurement (b) Forward scattering measurement

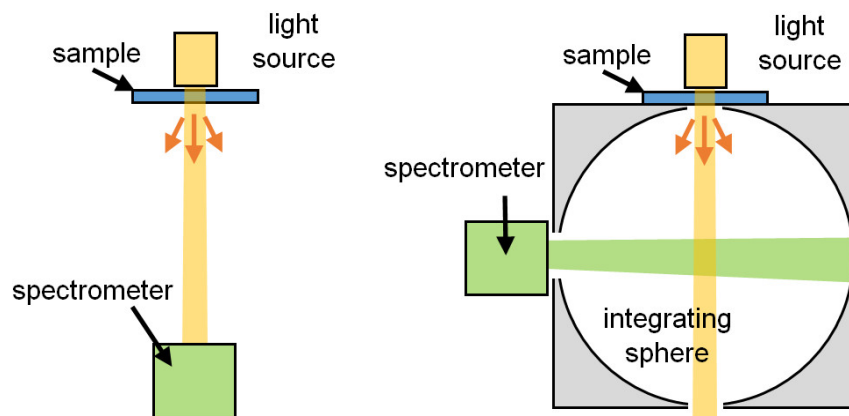

**Figure S3.** Optical setup of the transmission measurement and forward scattering measurement with an integrating sphere in (a) transmission and (b) forward scattering setup.

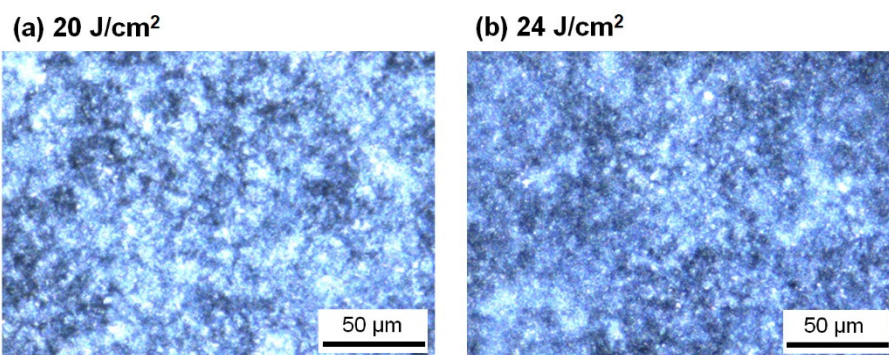

**Figure S4.** Dark field microscope images of the LTNS films obtained at (a) 20 J/cm<sup>2</sup> and (b) 24 J/cm<sup>2</sup>.

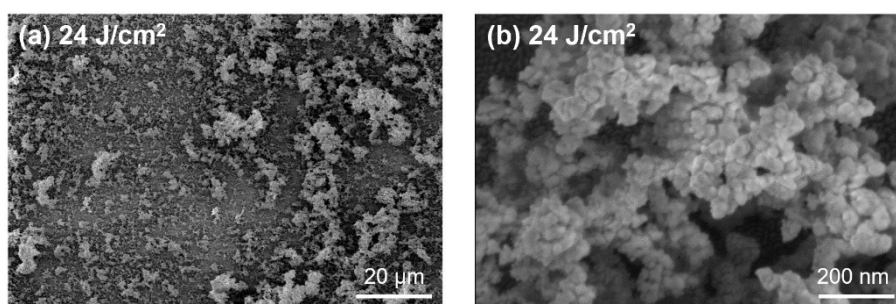

**Figure S5.** (a) SEM images of the LTNS film obtained at 24 J/cm<sup>2</sup>, and (b) the enlarged view.

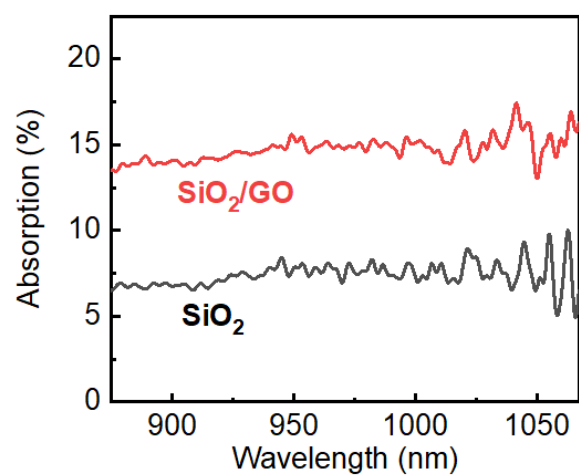

**Figure S6.** NIR absorption spectra of the donor films.
